# Supplementary material for: Plasmonic nanometal surface energy transfer-based dual excitation biosensing of pathogens
Source: Royal Society of Chemistry journal article supplement (doi:10.1039/d1sd00073j), 2022-01-01
Supplement: d1sd00073j11.pdf [file d1sd00073j11.pdf]

## Plasmonic Nanometal Surface Energy Transfer-based Dual Excitation Biosensing of Pathogens

Milad Torabfam,<sup>a</sup> Hasan Kurt,<sup>b,c,d</sup> Mustafa Kemal Bayazit,<sup>e</sup> Meral Yüce<sup>e\*</sup>

---

<sup>a.</sup> Sabanci University, Faculty of Engineering and Natural Sciences, 34956, Istanbul, Turkey.

<sup>b.</sup> Istanbul Medipol University, School of Engineering and Natural Sciences, 34810, Beykoz, Istanbul, Turkey

<sup>c.</sup> Istanbul Medipol University, Research Institute for Health Sciences and Technologies (SABITA), 34810, Beykoz, Istanbul, Turkey

<sup>d.</sup> Nanosolar Plasmonics Ltd., 41400, Gebze, Kocaeli, Turkey

<sup>e.</sup> Sabanci University, SUNUM Nanotechnology Research and Application Centre, 34956, Istanbul, Turkey.

**\*Corresponding authors:** [meralyuce@sabanciuniv.edu](mailto:meralyuce@sabanciuniv.edu)

---

## Supporting Information

Table S 1. NSET-based sensors for target detection in the literature.

| Target Pathogen(s)                    | Donor                                                                          | Acceptor       | LOD                      | Ref. |
|---------------------------------------|--------------------------------------------------------------------------------|----------------|--------------------------|------|
| DNA                                   | SiO <sub>2</sub> coated CdTe (CdTe/SiO <sub>2</sub> ) core/shell nanoparticles | AuNPs          | 0.106 nmol/L             | 1    |
| hepatitis C virus (HCV) RNA           | Cy3 dye                                                                        | AuNPs          | 300 fM                   | 2    |
| Cu <sup>2+</sup> and Hg <sup>2+</sup> | Ring-open structured rhodamine spirolactam                                     | AuNPs          | ----                     | 3    |
| Mercury(II)                           | DNA-conjugated QDs                                                             | AuNPs          | 1.2 ppb                  | 4    |
| Hg(II)                                | Rhodamine B (RhB) dye                                                          | AuNPs          | 2 ppt                    | 5    |
| Glutathione                           | 5-aminofluorescein (FI-NH <sub>2</sub> )                                       | AuNPs          | ----                     | 6    |
| C-Reactive protein                    | Fluorescein                                                                    | AuNPs          | ----                     | 7    |
| Prostate specific antigen (PSA)       | QD labeled PSA aptamer                                                         | Graphene oxide | 0.05 fg mL <sup>-1</sup> | 8    |
| Hg <sup>2+</sup>                      | S,N co-doped carbon dots (S,N-CDs)                                             | AgNPs          | 0.51 nM                  | 9    |
| Heparin                               | Near-infrared fluorophore                                                      | AuNRs          | 6.7 ng/mL                | 10   |

Table S 2. Aptamers and complementary DNA sequences used in this study.

| Target                                         | Aptamers (5'-NH <sub>2</sub> -C6)           | cDNAs (5'-NH <sub>2</sub> -C6) | Ref.   |
|------------------------------------------------|---------------------------------------------|--------------------------------|--------|
| <i>Salmonella typhimurium</i> (ATCC® 14028™)   | TATGGCGGCGTCACCCGACGGGGACTTGACATTATGACAG    | ATAATGTCAAGTCCCCGTCGGG         | 11, 12 |
| <i>Escherichia coli</i> O157:H7 (ATCC® 25922™) | CCGGACGCTTATGCCCTTGCCATCTACAGAGCAGGTGTGACGG | CCTGCTCTGTAGATGGCAAGGC         | 11, 12 |

Table S 3. The hydrodynamic size of the NPs utilized in this assay.

| Samples                        | Hydrodynamic size (nm) |
|--------------------------------|------------------------|
| CdSe/ZnS core/shell QDs        | 25.93                  |
| EC-Aptamer-QDs                 | 61.76                  |
| NaYF <sub>4</sub> :Yb/Er UCNPs | 41.8                   |
| ST-Aptamer-UCNPs               | 87.7                   |
| AuNR                           | 55.7                   |
| EC-cDNA-AuNR                   | 66.2                   |
| AuNU                           | 91.3                   |
| ST-cDNA-AuNU                   | 105.8                  |

Table S 4. Zeta potential of the unmodified and aptamer capped NPs.

| Samples                        | Zeta Potential (mV) |
|--------------------------------|---------------------|
| CdSe/ZnS core/shell QDs        | -32.5               |
| EC-Aptamer-QDs                 | -12.9               |
| NaYF <sub>4</sub> :Yb/Er UCNPs | -30.7               |
| ST-Aptamer-UCNPs               | -14.3               |
| AuNR                           | -20.8               |
| EC-cDNA-AuNR                   | -8.27               |
| AuNU                           | -22.2               |
| ST-cDNA-AuNU                   | -9.73               |

Table S 5. LOD values and calibration curve details for detection of *S. typhimurium* and *E. coli* using UCNP and QD-based aptasensor.

| Bacteria              | Linear Equation | R <sup>2</sup> | Linear Range (CFU mL <sup>-1</sup> ) | LOD (CFU mL <sup>-1</sup> ) |
|-----------------------|-----------------|----------------|--------------------------------------|-----------------------------|
| <i>S. typhimurium</i> | y=76.15x+113.81 | 0.9913         | 10 <sup>2</sup> -10 <sup>6</sup>     | 7.55                        |

## Supporting Information

|                |                    |        |             |      |
|----------------|--------------------|--------|-------------|------|
| <i>E. coli</i> | $y=97.301x+128.96$ | 0.9743 | $10^2-10^6$ | 4.94 |
|----------------|--------------------|--------|-------------|------|

Table S 6. LOD values and calibration curve parameters for simultaneous detection of *S. typhimurium* and *E. coli* using dual excitation luminescence nanoprobes.

| Bacteria              | Linear Equation  | R <sup>2</sup> | Linear Range (CFU mL <sup>-1</sup> ) | LOD (CFU mL <sup>-1</sup> ) |
|-----------------------|------------------|----------------|--------------------------------------|-----------------------------|
| <i>S. typhimurium</i> | $y=40.54x+46.67$ | 0.994          | $10^2-10^5$                          | 9.313                       |
| <i>E. coli</i>        | $y=64.36x+60.93$ | 0.972          | $10^3-10^5$                          | 7.38                        |

Table S 7. Multiplexed sensing of *S. typhimurium* and *E. coli* in spiked lake water samples.

| Sample       | Spiked Concentration (CFU mL <sup>-1</sup> ) |                       | Measured Concentration (CFU mL <sup>-1</sup> ) |                                 |
|--------------|----------------------------------------------|-----------------------|------------------------------------------------|---------------------------------|
|              | <i>E. coli</i>                               | <i>S. typhimurium</i> | <i>E. coli</i>                                 | <i>S. typhimurium</i>           |
| Lake water 1 | $1.0 \times 10^2$                            | $1.0 \times 10^2$     | $(1.1462 \pm 0.13) \times 10^2$                | $(0.9112 \pm 0.07) \times 10^2$ |
| Lake water 2 | $1.0 \times 10^3$                            | $1.0 \times 10^3$     | $(1.0762 \pm 0.10) \times 10^3$                | $(0.9860 \pm 0.12) \times 10^3$ |
| Lake water 3 | $1.0 \times 10^4$                            | $1.0 \times 10^4$     | $(1.0288 \pm 0.11) \times 10^4$                | $(1.113 \pm 0.09) \times 10^4$  |

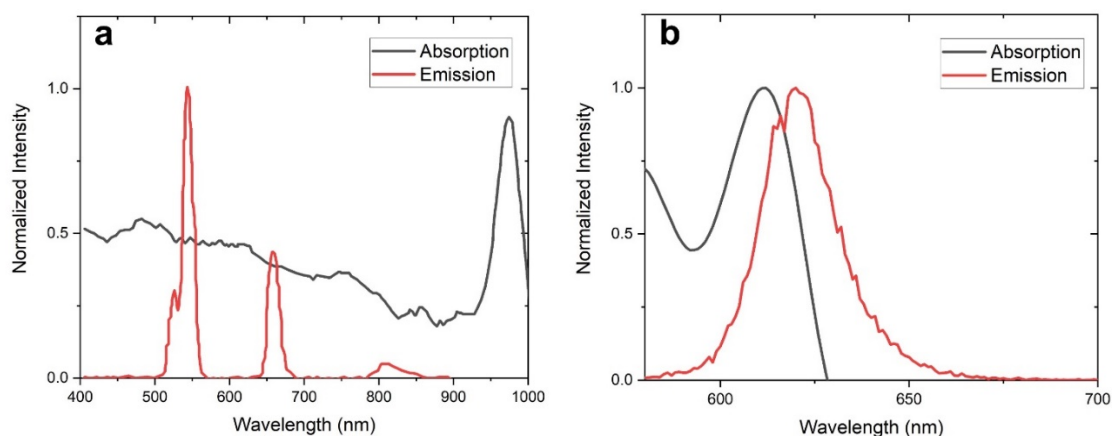

Figure S 1. Absorption and emission spectra related to a) UCNP, and b) QDs.

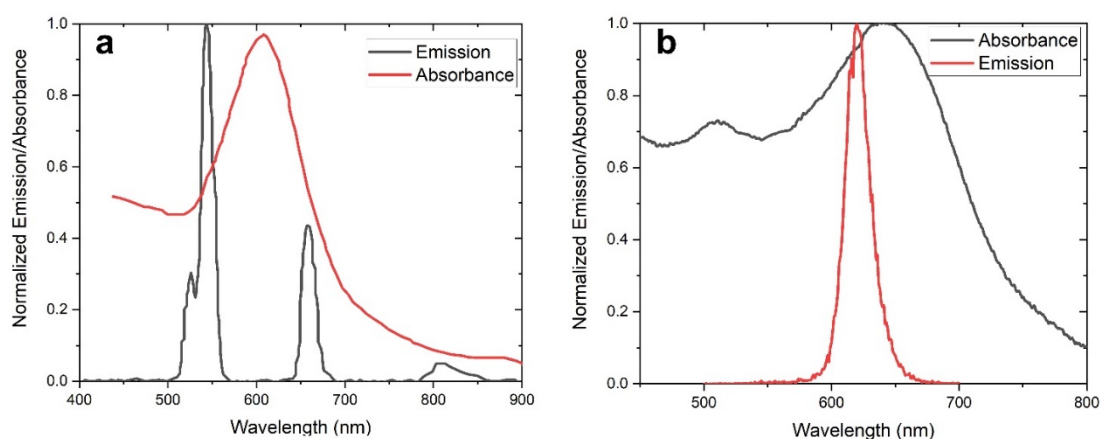Figure S 2. Emission/absorption spectra of a) NaYF<sub>4</sub>: Yb, Er UCNP/AuNU, and b) CdSe/ZnS core/shell QD/AuNR.

## Supporting Information

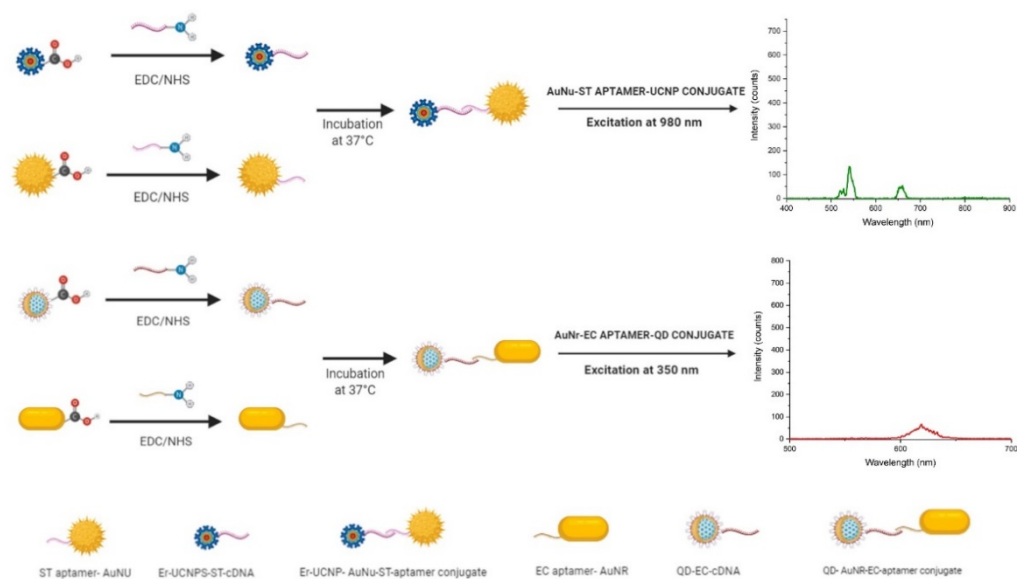

Figure S 3. Preparation of the AuNS-aptamer-cDNA-LNP conjugates.

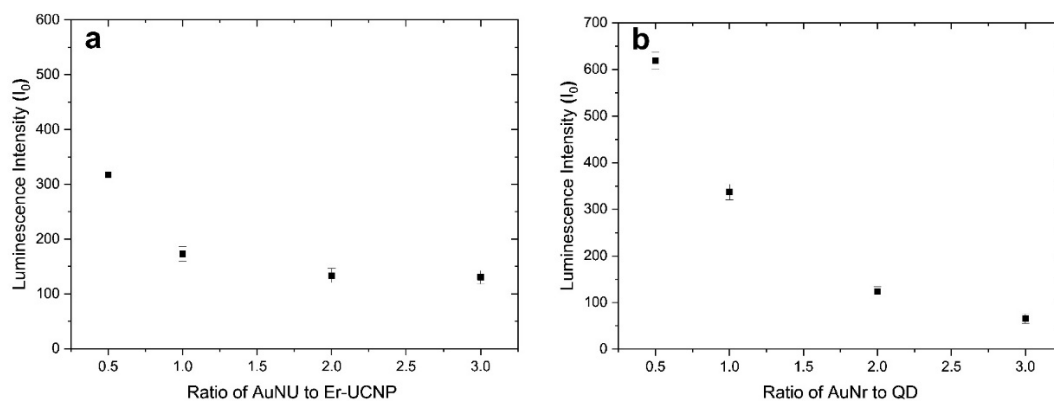

Figure S 4. The luminescence intensity of the a) UCNPs-AuNu conjugates at 545 nm b) QD-AuNR conjugates at 620 nm in terms of various initial acceptor/donor ratios in 1x PBS.

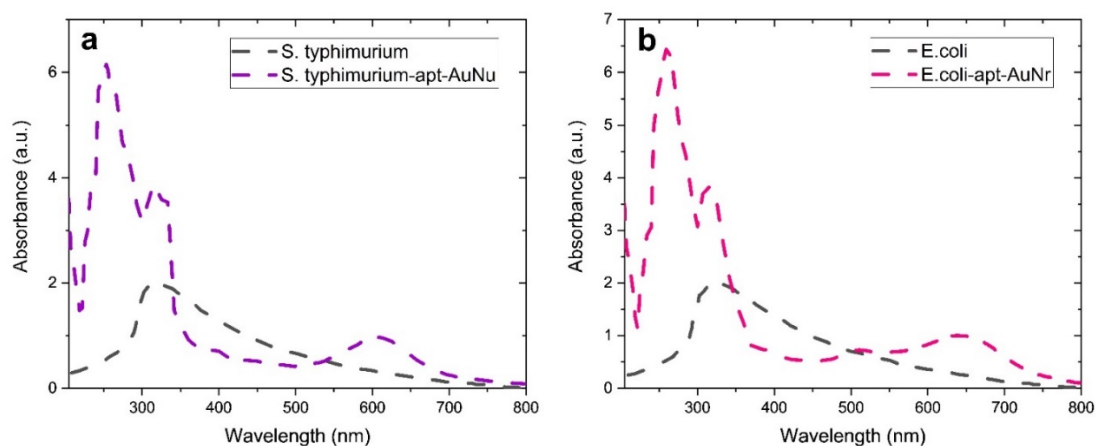Figure S 5. UV-vis absorption spectra of a) *S. typhimurium* with and without related AuNu-aptamer, b) *E. coli* with and without AuNR-aptamer.

## Supporting Information

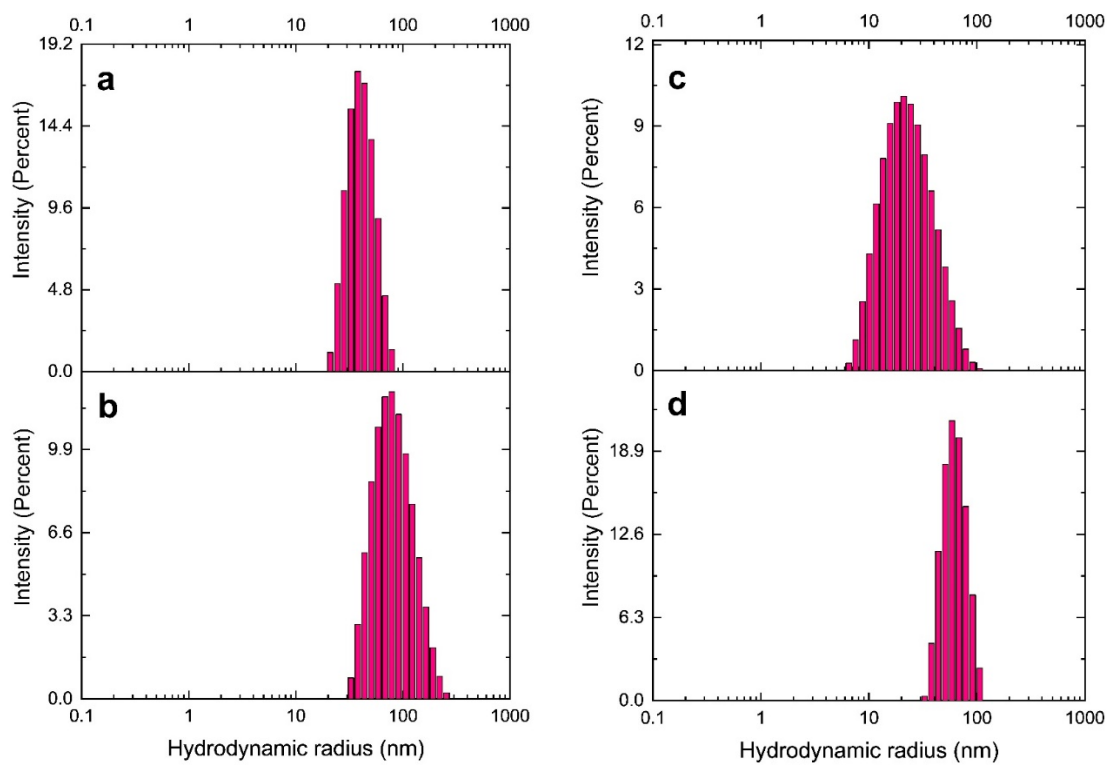

Figure S 6. Hydrodynamic size distribution of a) unmodified UCNP and b) ST cDNA-coupled UCNP, c) unlabeled QD, and d) EC cDNA-modified QDs.

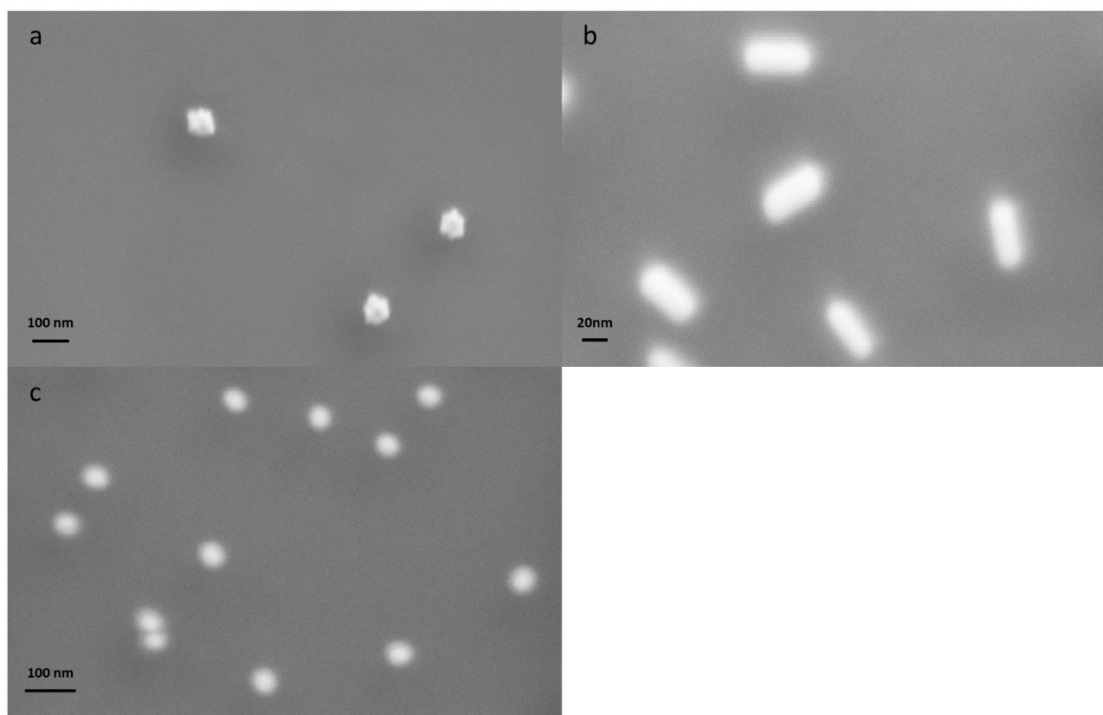

Figure S 7. SEM images of a) ST-aptamer-functionalized AuNU and b) EC-aptamer-functionalized AuNR, and c) ST-cDNA-modified UCNP.

Supporting Information

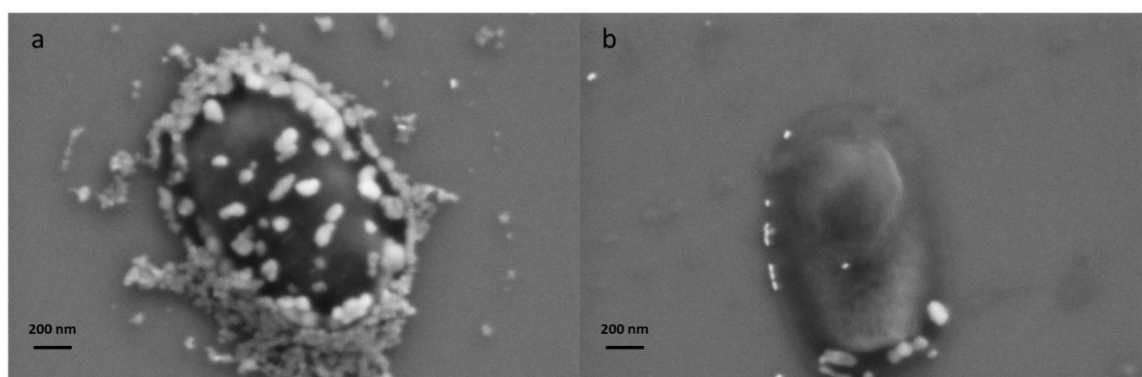

Figure S 8. SEM images of a) ST-AuNU nanoprobe with *S. typhimurium*, and b) EC-AuNR nanoprobe with *E. coli*.

---

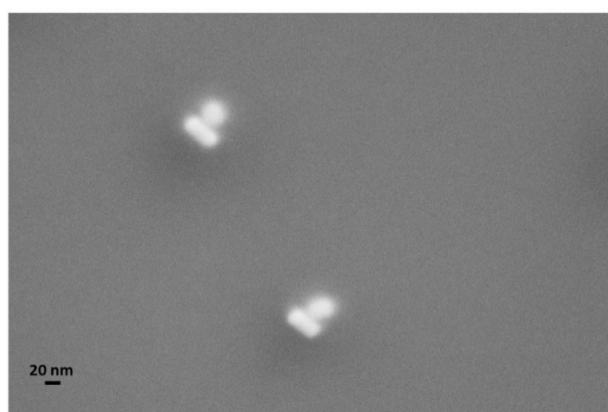

Figure S 9. SEM images of UCNP-AuNR conjugate.

---

## Supporting Information

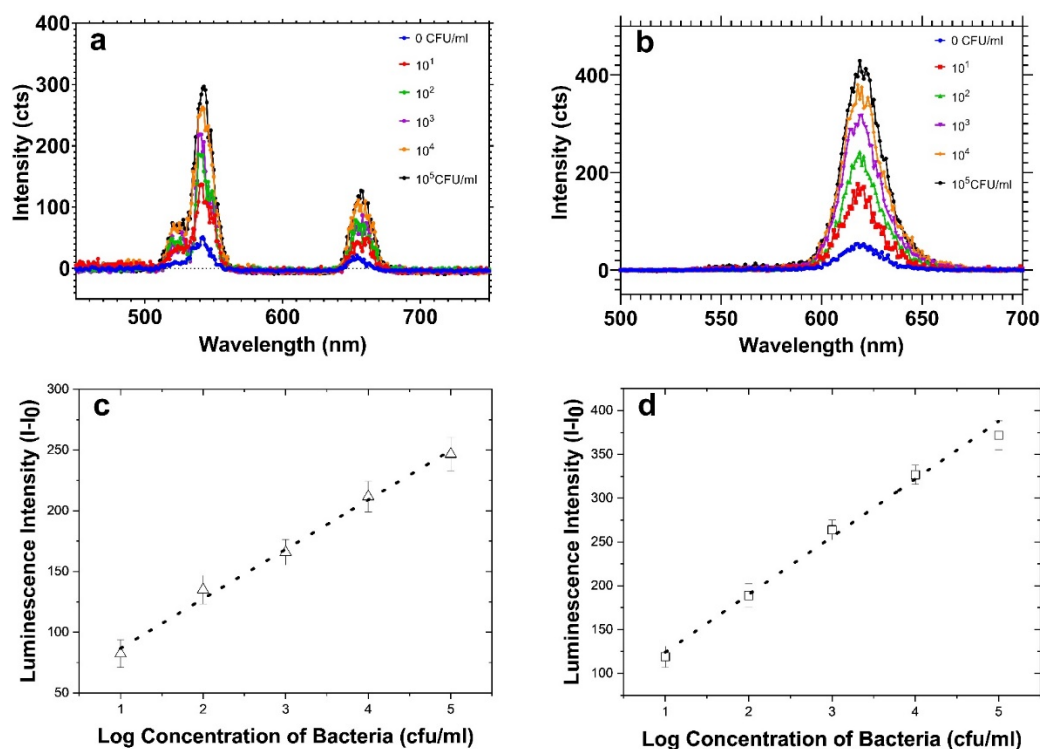

Figure S 10. The luminescence intensity increase of a) UCNP and b) QD nanoprobe versus the logarithmically increased concentrations of *S. typhimurium* and *E. coli*, respectively. The Calibration curves for multiplex sensing of c) *S. typhimurium* and d) *E. coli* are also provided.

## Reference

1. W. Guo, Y. Wei, Z. Dai, G. Chen, Y. Chu and Y. Zhao, *Materials*, 2018, **11**.
2. J. Griffin, A. K. Singh, D. Senapati, P. Rhodes, K. Mitchell, B. Robinson, E. Yu and P. C. Ray, *Chemistry - A European Journal*, 2009, **15**, 342-351.
3. M. X. Gao, H. Y. Zou, Y. F. Li and C. Z. Huang, *Anal Chem*, 2017, **89**, 1808-1814.
4. M. Li, Q. Wang, X. Shi, L. A. Hornak and N. Wu, *Analytical Chemistry*, 2011, **83**, 7061-7065.
5. G. K. Darbha, A. Ray and P. C. Ray, *Acs Nano*, 2007, **1**, 208-214.
6. Q. Li, A. Sun, Y. Si, M. Chen and L. Wu, *Chemistry of Materials*, 2017, **29**, 6758-6765.
7. C. Bravin and V. Amendola, *Biosensors and Bioelectronics*, 2020, **169**, 112591.
8. B.-Y. Fang, C.-Y. Wang, C. Li, H.-B. Wang and Y.-D. Zhao, *Sensors and Actuators B: Chemical*, 2017, **244**, 928-933.
9. Z. Abolghasemi-Fakhri, T. Hallaj and M. Amjadi, *Luminescence*, 2021, DOI: 10.1002/bio.4040, 1-8.
10. J. J. Liu, D. Yuan, H. Z. Zhang, Y. D. Lu, N. Wang, H. Y. Zou and J. Wang, *Sensors and Actuators, B: Chemical*, 2018, **274**, 318-323.
11. H. Kurt, M. Yüce, B. Hussain and H. Budak, *Biosensors and Bioelectronics*, 2016, **81**, 280-286.
12. M. Yüce, H. Kurt, B. Hussain, C. W. Ow-Yang and H. Budak, *ChemistrySelect*, 2018, **3**, 5814-5823.
