# Supplementary figures and images for: Plasmonic nanometal surface energy transfer-based dual excitation biosensing of pathogens
Source: Royal Society of Chemistry journal article supplement (doi:10.1039/d1sd00073j), 2022-01-01

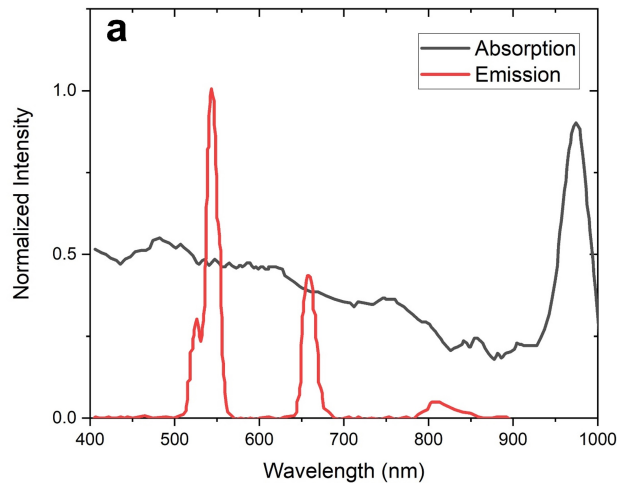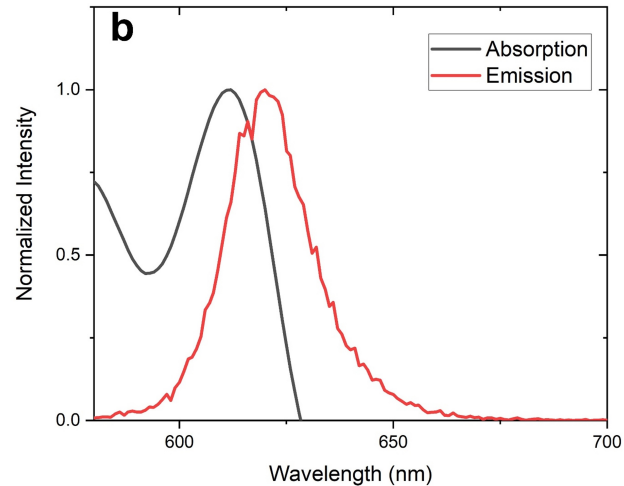

Supplement: d1sd00073j1.pdf [file d1sd00073j1.pdf]

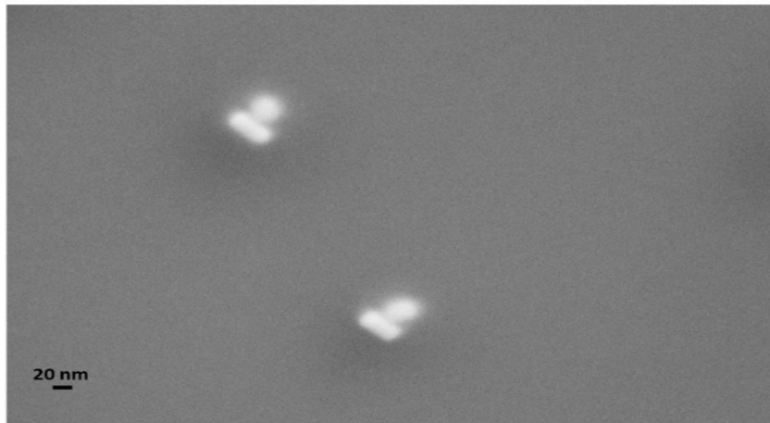

Supplement: d1sd00073j10.pdf [file d1sd00073j10.pdf]

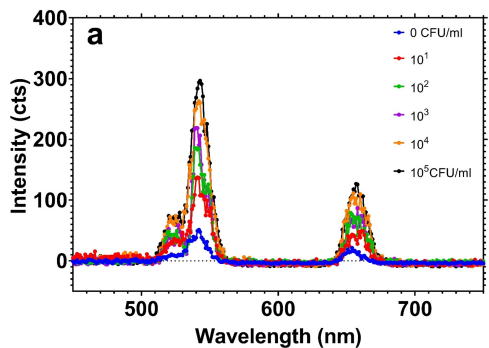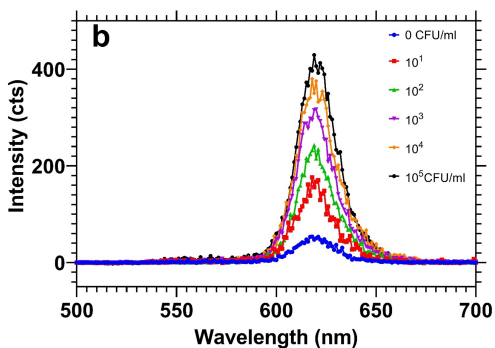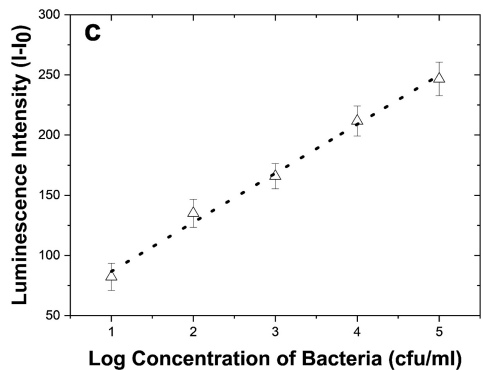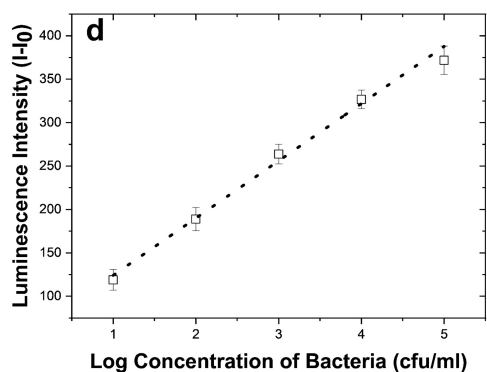

Supplement: d1sd00073j2.pdf [file d1sd00073j2.pdf]

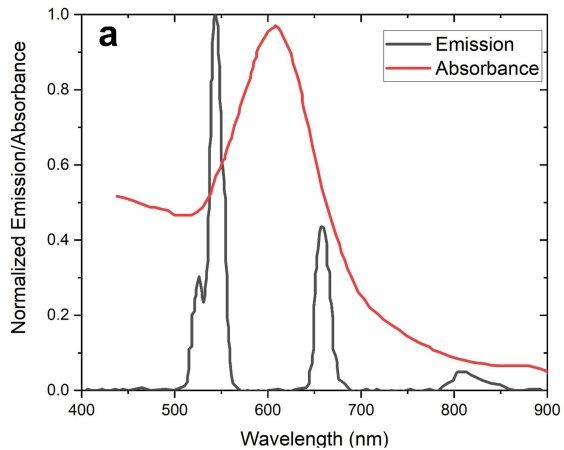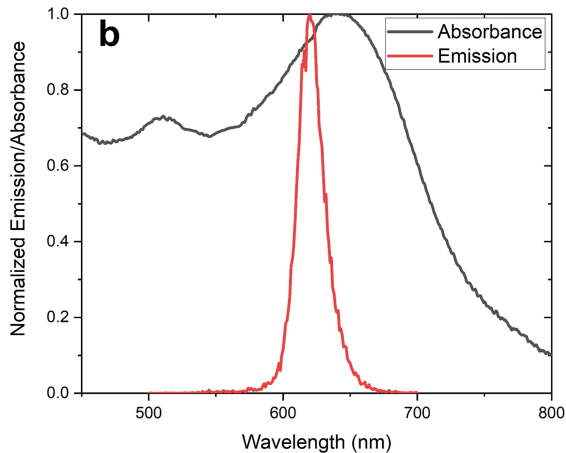

Supplement: d1sd00073j3.pdf [file d1sd00073j3.pdf]

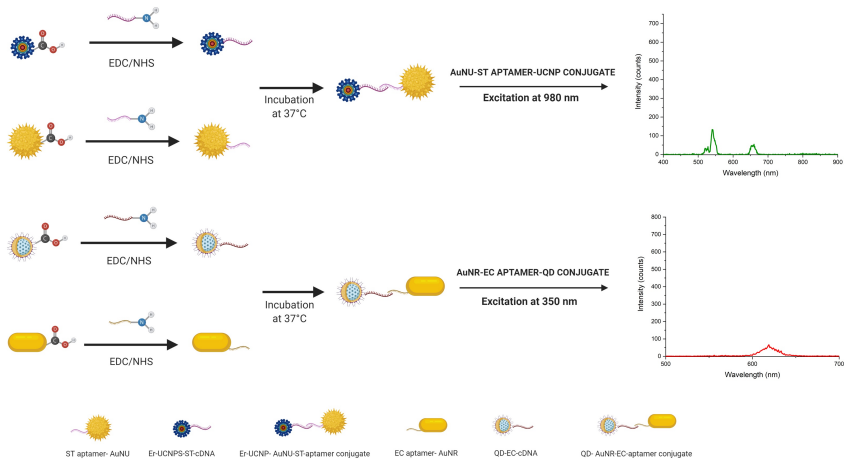

Supplement: d1sd00073j4.pdf [file d1sd00073j4.pdf]

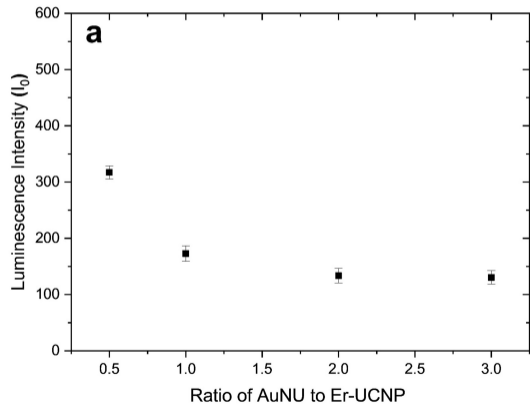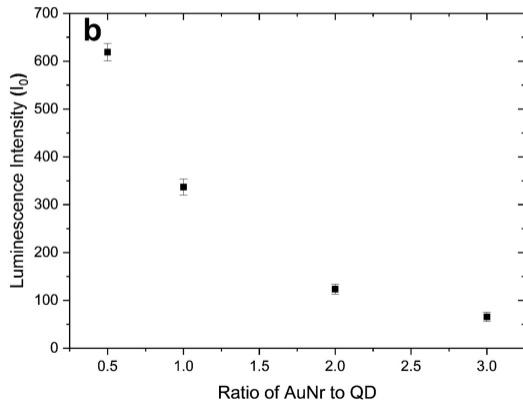

Supplement: d1sd00073j5.pdf [file d1sd00073j5.pdf]

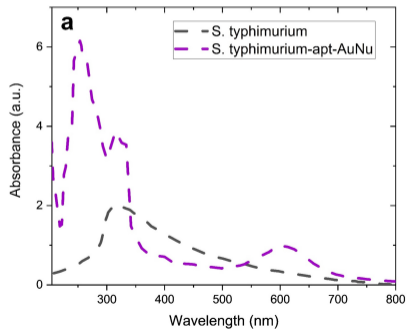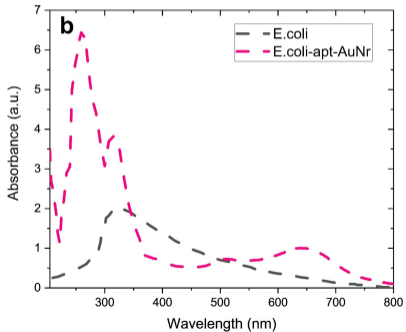

Supplement: d1sd00073j6.pdf [file d1sd00073j6.pdf]

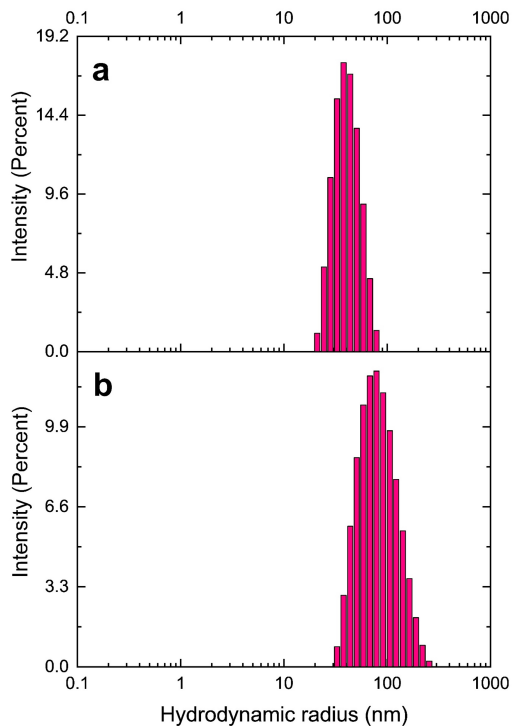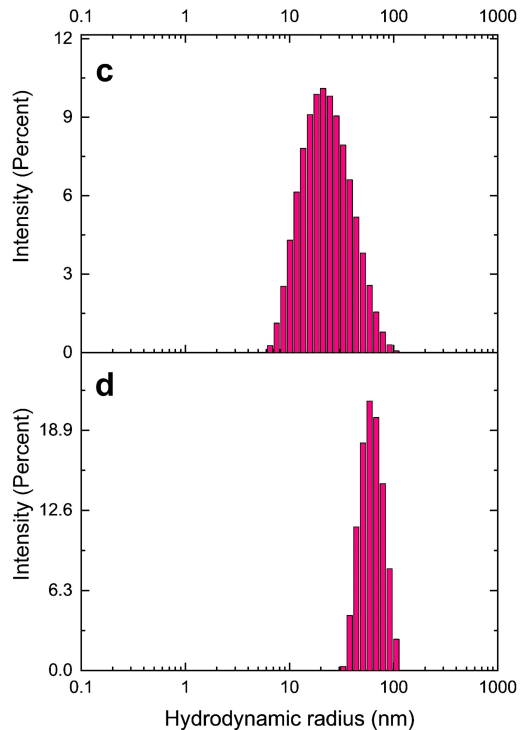

Supplement: d1sd00073j7.pdf [file d1sd00073j7.pdf]

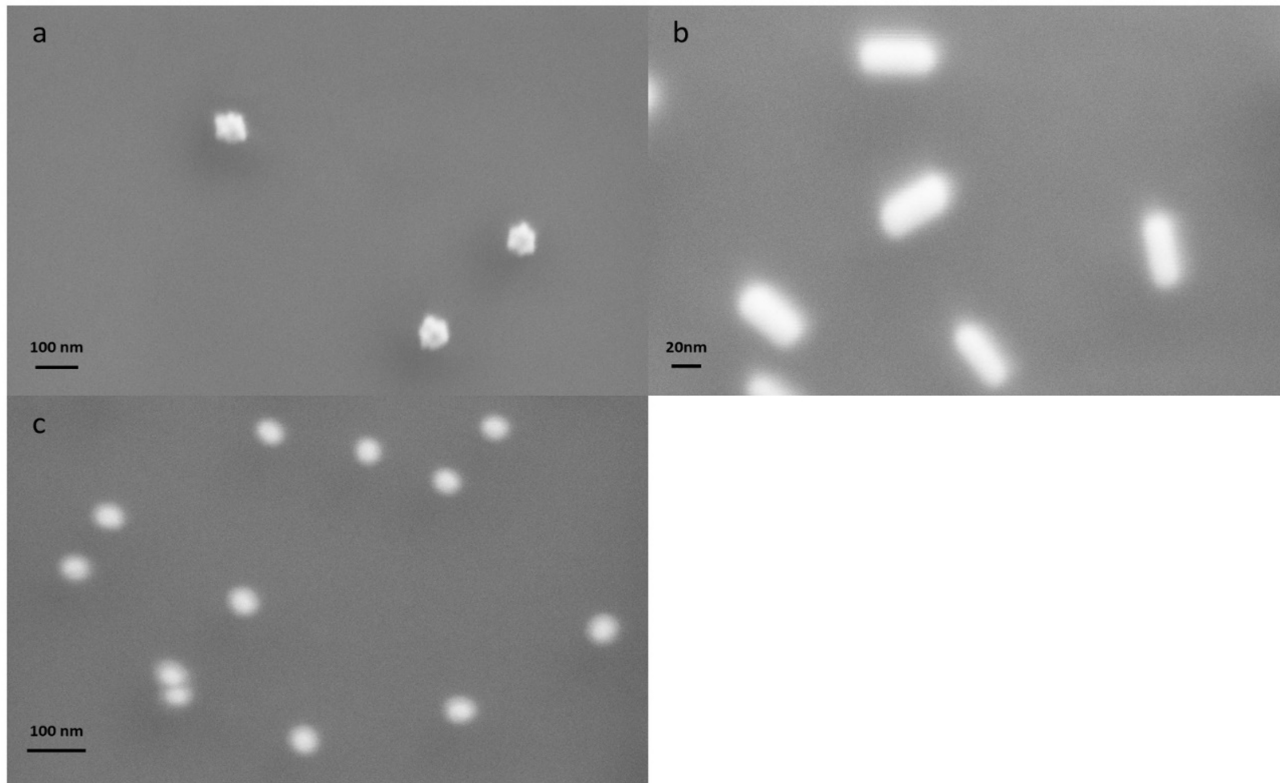

Supplement: d1sd00073j8.pdf [file d1sd00073j8.pdf]

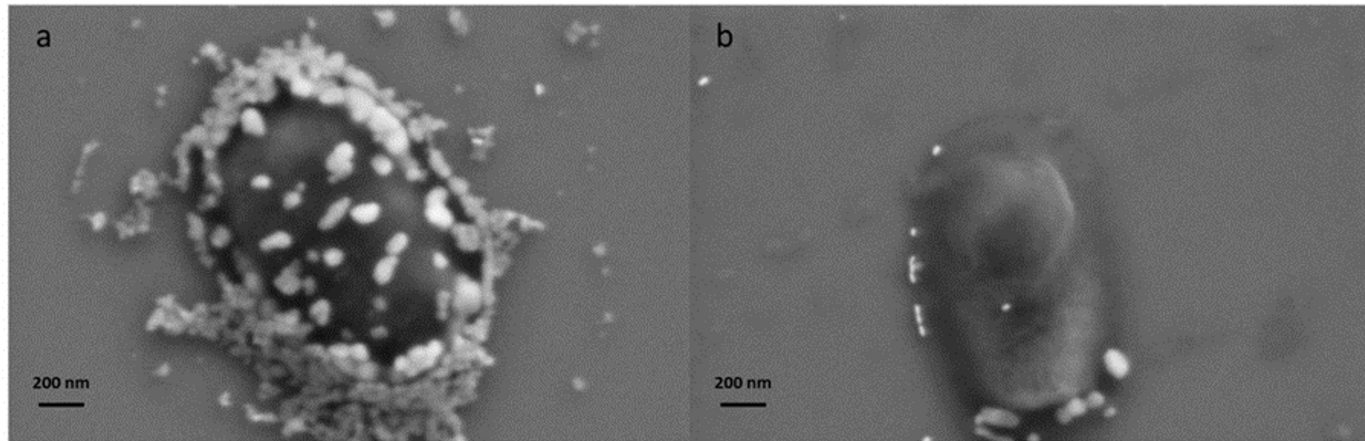

Supplement: d1sd00073j9.pdf [file d1sd00073j9.pdf]
